# Supplementary material for: Transposing an active fault database into a fault-based seismichazard assessment for Nuclear facilities.Part B: Impact of fault parameter uncertainties on a site-specificPSHA exercise in the Upper Rhine Graben, Eastern France
Source: Copernicus journal article supplement (doi:10.5194/nhess-2017-97), 2017-03-15
Supplement: Supplementary file [file answer_ref_GARCIA-MAYORDOMO.pdf › garcia_mayordomo/answer_ref_GARCIA-MAYORDOMO.pdf]

Dear Dr Garcia-Mayordomo,

Thank you for your questions, comments and suggestions that improved the quality of the article. You will find here our responses to your questions and we invite you to read the new version of the manuscript containing the changes you suggested.

**-Equation (1), Does V stand for average displacement? It should not be included in the C1 equation of Seismic Moment rate as slip rate is already accounted for in it (as “s”).**

Thank you for noticing this error. The equation has been corrected in the article.

**-Equation (5), I assume that the equation comes from somewhere else in literature. If this is the case, please, cite the paper. If not, then explain how you get to it further in detail. Additionally, you should name here the variable “V”.**

As for equation 1, “V” has been removed. We also added a reference to this equation (Cosentino, P., Ficarra, V., & Luzio, D. (1977). Truncated exponential frequency-magnitude relationship in earthquake statistics. *Bulletin of the Seismological Society of America*, 67(6), 1615-1623.).

**-In section 5 (Sensitivity), geometry at depth: I agree with your statements about the influence of dip in the hazard results (lower dip-> more hazard). However, Figure 6.c shows the opposite. I think it is just a problem with the legend: the continuous line should address Dip Max and the discontinuous Dip Min. Please, check it.**

It was a mistake in the legend and it has been updated. Thank you for pointing it out.

**-Figure 2 left (shouldn't it say “a”) instead of left?) The black line representing the mean UHS is missing.**

The figure has been corrected and a) and b) have been added. We hope it can help the reader.

**-Figure 2 right (shouldn't it say “b”) instead of right?) Could you explain further the point of this figure? I'm not sure if I'm interpreting it right. . . for example, can I say that CF08 is the only GMPE that threw results  $PGA > 0.7g$ ? Additionally, it is difficult to interpret the figure as the colors mix. . . it is a bit confusing. I think you could provide a clearer figure (regular histograms) and explain it a bit further in the manuscript.**

We updated the figure with a regular histogram and a) and b) have been added. We hope it's clearer to the reader.
